# Supplementary material for: Probiotic Effects on Multispecies Biofilm Composition, Architecture, and Caries Activity In Vitro
Source: MDPI journal article supplement (doi:10.3390/microorganisms8091272), 2020-08-21
Supplement: s1 [file s1]

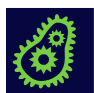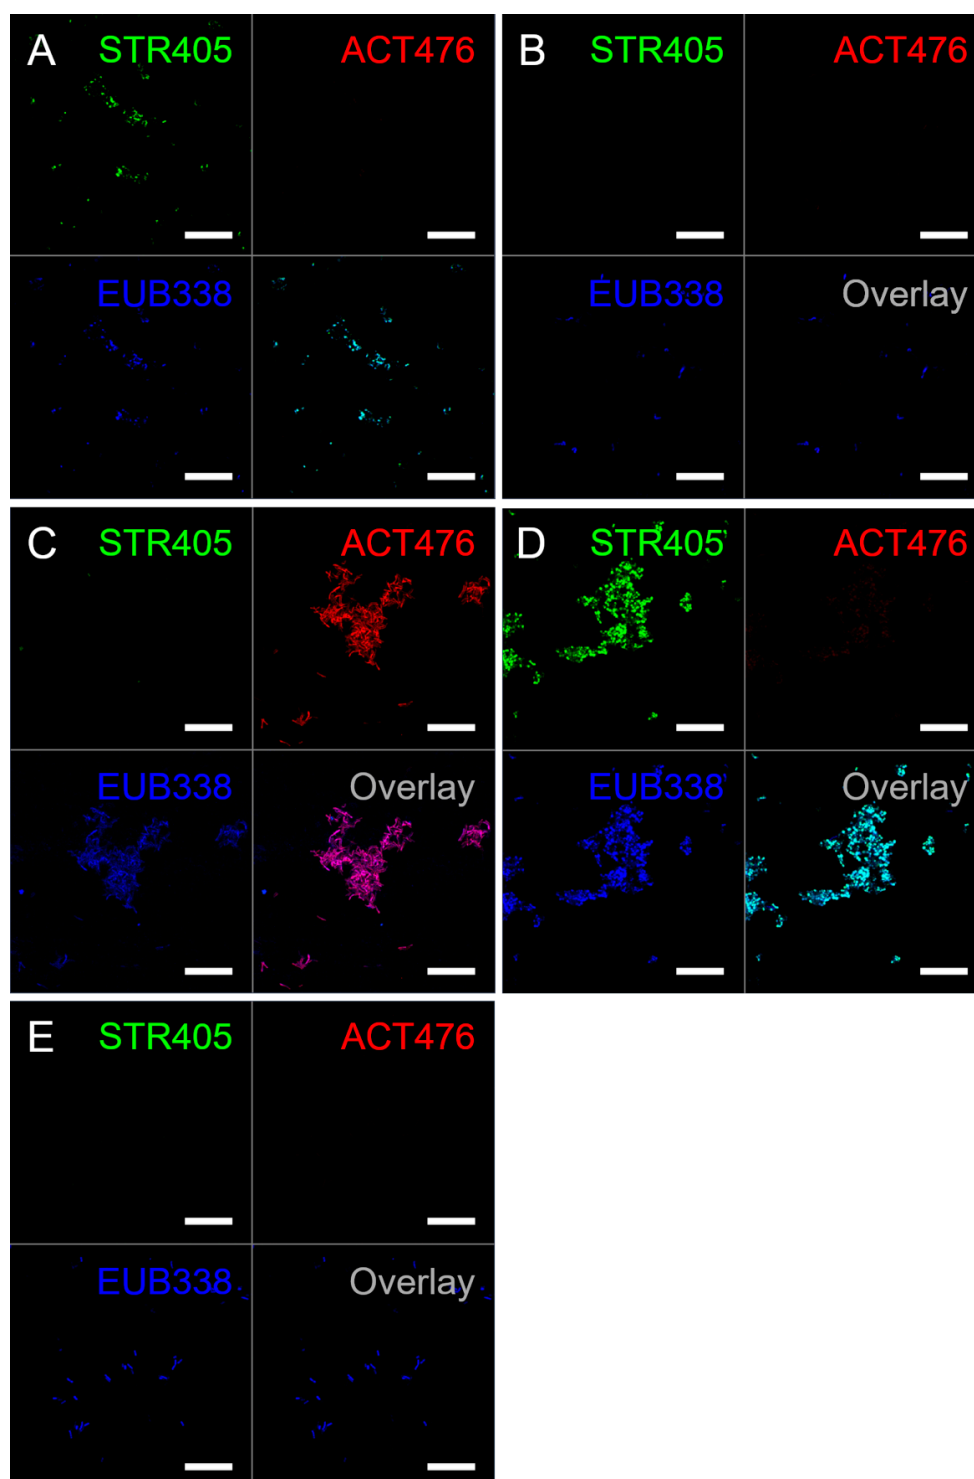

**Figure S1.** The specificity of the employed FISH probes. At a formamide concentration of 30 % in the hybridization buffer, all probes were specific for their targets. *S. mutans* (A) and *S. oligofermentans* (D) were visualized by the *Streptococcus*-specific probe STR405 and the universal probe EUB338, but not by the *Actinomyces*-specific probe ACT476. *L. rhamnosus* (B) and *L. reuteri* (E) were targeted by EUB338 only. *A. naeslundii* (C) was visualized by ACT476 and EUB338, but not by STR405. Scale bars = 20  $\mu\text{m}$ .
